# Supplementary material for: Iron oxides in thecryoconiteon the glaciers over Tibetan Plateau: abundance, speciationand implications
Source: Copernicus journal article supplement (doi:10.5194/tc-2018-70), 2018-05-25
Supplement: Supplementary file [file tc-2018-70-AC1-supplement.pdf]

We would like to thank the reviewer for the time and effort reviewing the manuscript. The comments are very thoughtful and helpful for improvement of our manuscript. We have listed all reviewer comments below and our answers are provided in blue. A version of the revised manuscript was provided as a supplement.

### **Anonymous Referee #1**

This paper concerns iron geochemistry in cryoconite samples from the Tibetan plateau region. Its main focus is on the optical impacts related to iron oxides on the properties of cryoconite and of its potential role in the reduction of glacial albedo, also considering other impurities that could play a role in this context: organic and inorganic carbon and dust. The topic is definitely appropriate for The Cryosphere. Unfortunately, I have some concerns about the methodological side of this work. This is a paper where the experimental side is dominant, since many measurements were carried out, using different instruments and techniques. For this reason I would have expected that the discussion about accuracy, precision, reproducibility was expanded and largely detailed. On the contrary it is poor and the reader cannot understand and evaluate the significance and the robustness of the data.

**Reply:** Thank you for the comments. We totally agree with you that the data quality is the essential of the research. Now we tried our best to provide the quality control information for each measurement, involving accuracy, precision and reproducibility. Please check the details in the revised manuscript.

One of the most critical points concerns sample preparation for ICP-MS. The authors declare that the samples were prepared for ICP-MS analyses using 1% HNO<sub>3</sub>. This is impossible. Dealing with mineral samples it is necessary to completely dissolve them using high concentration inorganic acids. Nitric acid alone is not sufficient and surely if used at the concentration of 1%. For

example, there are a lot of mineral phases that can be dissolved only using a mixture of  $\text{HClO}_4$ ,  $\text{HF}$  and  $\text{HNO}_3$ . If the authors applied the protocol they described, results cannot be considered reliable and I also cannot believe that their recovery factor for Fe was 95 %. Using 1%  $\text{HNO}_3$  is almost the same of using pure water. The authors should explain in detail this point. In addition to this, it should be taken into account that the authors applied a stronger acid attack to the samples for carbon analysis, I am asking myself why they didn't apply the same protocol for ICP-MS measurements.

**Reply:** Thank you very much for pointing out this critical problem. Due to our carelessness, this sentence appears misleading. Actually, here 1%  $\text{HNO}_3$  means the samples were conditioned in 1%  $\text{HNO}_3$  solution finally after digestion, and ready for the subsequent ICP-MS analysis. For the digestion, we did use strong acids to treat the cryoconite samples. Now we added the detailed description of the sample pretreatment as following (Page 3, Line 23-38 in the revised manuscript):

*A portion of cryoconite sample (about 20 mg) was dissolved under a laboratory hood using  $\text{HF}+\text{HNO}_3$  mixture through three steps. In details, the sample was firstly transferred into PTFE high-pressure digestion vessel, and 1 mL HF and 1 ml  $\text{HNO}_3$  were added. The digestion vessel was then ultrasonic treated for 20 min, and evaporated to nearly dry on a hot plate. Another 1 mL HF and 1 ml  $\text{HNO}_3$  were added, and digested in an oven at 190 °C for 24 h. After cooling, the vessel was opened and evaporated to nearly dry again (on the plate at 150 °C), then followed by a second addition of  $\text{HNO}_3$ . This procedure was repeated to wipe off the HF completely. Then 1mL  $\text{HNO}_3$  and 3mL  $\text{H}_2\text{O}$  were added to the vessel and put it into the oven for another 24h at 150 °C. After cooling, the final solution was diluted with pure water to about 50mL.*

*Eventually, it was measured by inductively coupled plasma-mass spectrometry (ICP-MS, Thermo X7, Thermo-Elemental Corp.) for Fe and other elements. Indium, Rhodium and Rhenium solution were used as internal*

*standards. The accuracy and precision of trace elements was ascertained based on repeated measurement of the USGS Geochemical Reference Standard (Andesite, AGV-2). The measured and certified values for Fe agree well, with recovery better than 95%. The detailed description of the analytical protocol in our laboratory could be found in previous work (Wu et al., 2009).*

Still on the methodologies. I have some concerns about their method to estimate the mineral composition of Fe oxides. At first it should be mentioned that if the datum about total iron content (i.e. the one gathered through ICP-MS) is wrong, all the successive analysis about “free iron-total iron-oxide iron” is in turn inaccurate. Secondly the equation presented at page 4, line 26, is given without any explanation or reference and it is the equation that allowed the authors distinguishing goethite from hematite. What is strange is that the authors used only hematite to test and validate their method, but they are working on both the oxides. Given the fact that one of the main result of this work is that Fe oxide contained in cryoconite is almost completely composed by goethite (more than 80%), it is strange that they prepared their calibration using only hematite, which accounts only for less than 20 % of their samples.

**Reply:** Just as explained above, we believed that the total iron content determined by ICP-MS in this study is reliable. Furthermore, hematite and goethite are the two main coloring agents in mineral dusts and are characterized by distinct colors, red and yellow, respectively. Hematite was chosen to be quantified rather than goethite, because hematite is a more intense (effective) coloring agent than goethite. The limit of detection for Hm can be as low as 0.01% by weight (Balsam et al., 2014; Deaton and Balsam, 1991; Ji et al., 2002; Lu et al., 2017). Now we added this explanation in the main text (please see the changes in Page 4, Line 30-34) with the relevant references.

PAGE 1 Line 18: change to “influence the radiative properties of mineral dust and thus its radiative impact. In particular, the different optical features of. . .”

**Reply:** Changed.

Line 20: the term speciation is not appropriate here, you are talking about minerals, not elements. You could refer to “geochemical behavior” or something like that; change to “from five glaciers located in different regions of the Tibetan. . .”

**Reply:** Changed.

Line 21: “abundance” Line 22: change to “. . . by mass, in accordance to typical natural background level”

**Reply:** Changed.

Line 23-25: the passage is not clear, why finding such ratios should be indicative about considering free or immobile iron fractions? Probably something is missing here.

**Reply:** Changed.

Line 25-27: I guess that here you are referring to the only immobile fraction of Fe, aren't you? So probably it would be better to change to “Considering the immobile mineral Fe fraction, goethite is definitely dominant, accounting for more than 80 % of total iron”.

**Reply:** Here, it means goethite content (%) in iron oxides (i. e. free iron fraction).

Line 31: change to “anthropogenic/natural impacts on glaciers.”; remove “and then taking the proper mitigation measures.”

**Reply:** Changed.

Line 33: they can do that, not could

**Reply:** Changed.

Line 34: you talk about glacier and snowpack, what about ice?; change to “more solar energy, with effects on glacier mass balance (Warren and Wiscombe, 1985)

**Reply:** Usually, the glacier surface is covered by snowpack. So, we used snowpack instead of bare ice.

Line 35: improve references, there are plenty of good works about this point, not only one; remove “along with the rising air temperatures (IPCC, 2014)”

**Reply:** The reference cited here is a comprehensive review paper, which was contributed by different groups in this field, and well reflected the recent progress on this issue. Now we changed it to (Qian, et al., 2015 and the references therein).

Line 37: what is soil dust? On the surface of glaciers it is more common to find rock fragments or dust produced from the weathering of the surrounding rocky outcrops. In addition to this you should also considered long-range transport from arid areas. See Cook et al., 2016 to review this point (“The dark biological secret of the cryosphere”).

**Reply:** Yes, the dust over glacier surface could originate from different sources, not only the soil. To make it clear, now we use “mineral dust”. In this work, our focus is not to differentiate the long-range transport or local source of dust.

PAGE 2

Line 1-4: I don’t understand why the compositional complexity of TP cryoconite should be major than the one of cryoconite from other areas. Be careful because Baccolo et al., 2017 talks about Alpine cryoconite, not about the TP.

**Reply:** Here we cited the reference of Baccolo et al., 2017, with the aim to give a definition of cryoconite. For the mountainous glaciers, the cryoconite at Alpine and Tibetan Plateau share similarities, although specific components may vary.

Line 5: change to: “Considering this region, tremendous attention has been paid to. . .” Line 6: change “partly” with “mainly”

**Reply:** Changed.

Line 7: remove “and is receiving strong influences from those anthropogenic Emissions”

**Reply:** Changed.

Line 8: change “Nevertheless” with “On the contrary”; change to “despite dust is apparently the predominant. . .”

**Reply:** Changed.

Line 12: change to “the snow albedo reduction and the subsequent radiative forcing caused by dust overwhelm the impact related to black carbon.

**Reply:** Changed.

Line 14: “models”

**Reply:** Changed.

Line 15: change to: “only dust concentration is taken into account, not its composition”

**Reply:** We intend to keep the current expression.

Line 16-22: consider also Formenti et al., 2014 (“Dominance of goethite over hematite in iron oxides of mineral dust from Western Africa: Quantitative partitioning by X-ray absorption spectroscopy”) and references therein. You are saying that these two oxides are the most common ones “in nature”, but this true only if you talk about atmospheric mineral dust, not if you consider the entire Earth (see for example Torrent et al., 1983 “Quantitative relationships between soil color and hematite content”). Rewrite this passage.

**Reply:** The reference (Formenti et al., 2014) has been added here. And we changed “in nature” into “mineral dust”.

Line 23-24: Why you say “are not well understood”? You could say that they are not investigated, not that they are not understood. Do you know a recent paper from Hawkings et al., 2018? (“Bioavailable ferrous iron bearing nanoparticles in glacial sediments”), I guess you could find useful information in this sense.

**Reply:** Thank you for this point. The recent work by Hawkings and colleagues studied the iron speciation and bioavailability (Fe(II) and Fe(III)-

bearing nanoparticles) in Arctic glacial area. Now this paper (Hawkings et al., 2018) was cited to better reflect the progress on this subject.

Line 25: “remains”; change to “The aim of the present work is to estimate the radiative forcing of cryoconite in the TP region, trying to address several key issues.”

**Reply:** Changed. Actually, the present work did not estimate the radiative forcing directly, while only constrained the uncertainties through the iron study.

Line 34: change “examine” with “consider”; “regions”; remove “and surroundings”

**Reply:** Changed. But we intend to keep “and surroundings”, because one site in this study (Urumqi No. 1 Glacier) does not belong to Tibetan Plateau. So “surroundings” is more appropriate regarding the geographic definition.

Line 35: change to “were chosen to sample the cryoconite”; change to “A detailed description of the collection sites is given in Table 1”

**Reply:** Changed.

Line 36: change to “ The Urumqi No.1 glacier (UG, 43°06’N, 86°49’E), presents two branches covering 1.6 km<sup>2</sup>, it is located in eastern Tien Shan. The air circulation of this region is dominated by westerly winds in summer and by the influence of the Siberian High baric field during winter (Wang et al, 2014).”

**Reply:** We intend to keep the original expression.

PAGE 3

Line 2: change to “(LHG, XX°XX’X, XX°XX’X)

**Reply:** Changed.

Line 3: change to “where a typical continental climate is found (Dong et al., 2014)”

**Reply:** We intend to keep the original expression.

Line 5: follow the same scheme of above “(XDK, XX°XX’X, XX°XX’X)”

**Reply:** Changed.

Line 6: “at the center of TP”

**Reply:** Changed.

Line 7: “Tanggula Mountains represent the northern boundary of the area influenced by the South Asian monsoon.”

**Reply:** Changed.

Line 8: “(PL, XX°XX’X, XX°XX’X)” Line 10: “and it is characterized” Line 11: “(BS, XX°XX’X, XX°XX’X)”; “with a length of 2.26 km and an area of 1.32 km<sup>2</sup>” Line 12: “in the Yulong Mountains, at the southeastern edge of TP”

**Reply:** Changed.

Line 13: “low altitude” Line 14: “kept frozen”

**Reply:** We intend to keep the original expression.

Line 17: “freeze-dried” what do you mean, explain; “and reduced to powder”; how did you powdered your samples? Explain also this point

**Reply:** Freeze-dried is a low temperature dehydration process, which involves freezing the samples and then removing the water (ice) by sublimation. It is commonly used in the laboratory. Here, the cryoconite samples turn into powder naturally after being freeze-dried.

Line 18: “Therefore in this work concentrations and fractions are referred to dry cryoconite mass.”

**Reply:** Changed.

Line 21: change to “under a laboratory bench”

**Reply:** Changed.



**\*\*Thank you again for your valuable comments and suggestions.**

## **Reference**

- Balsam, W., et al., 2014. Determining hematite content from NUV/Vis/NIR spectra: Limits of detection. *American Mineralogist* 99, 2280-2291.
- Deaton, B.C., Balsam, W.L., 1991. Visible spectroscopy--a rapid method for determining hematite and goethite concentration in geological materials. *Journal of Sedimentary Research* 61.
- Formenti, P., et al., 2014. Dominance of goethite over hematite in iron oxides of mineral dust from Western Africa: Quantitative partitioning by X-ray absorption spectroscopy. *Journal of Geophysical Research: Atmospheres* 119, DOI: 10.1002/2014JD021668.
- Hawkings, J.R., et al., 2018. Biolabile ferrous iron bearing nanoparticles in glacial sediments. *Earth and Planetary Science Letters* 493, 92-101.
- Ji, J.F., Balsam, W., Chen, J., Liu, L.W., 2002. Rapid and quantitative measurement of hematite and goethite in the Chinese loess-paleosol sequence by diffuse reflectance spectroscopy. *Clays and Clay Minerals* 50, 208-216.
- Lu, W., et al., 2017. Iron Mineralogy and Speciation in Clay-Sized Fractions of Chinese Desert Sediments. *Journal of Geophysical Research: Atmospheres*.
- Wu, G., et al., 2009. Geochemistry of dust aerosol over the Eastern Pamirs. *Geochimica Et Cosmochimica Acta* 73, 977-989.

# Iron oxides in the cryoconite on the glaciers over Tibetan Plateau: abundance, speciation and implications

Zhiyuan Cong<sup>1,5,\*</sup>, Shaopeng Gao<sup>1</sup>, Wancang Zhao<sup>3</sup>, Xin Wang<sup>4</sup>, Guangming Wu<sup>1,6</sup>,  
Yulan Zhang<sup>2</sup>, Shichang Kang<sup>2,5,\*</sup>, Yongqin Liu<sup>1</sup>, and Junfeng Ji<sup>3</sup>

5 <sup>1</sup>Key Laboratory of Tibetan Environment Changes and Land Surface Processes, Institute of Tibetan Plateau Research, Chinese Academy of Sciences, Beijing 100101, China

<sup>2</sup>State Key Laboratory of Cryospheric Sciences, Northwest Institute of Eco-Environment and Resources, Chinese Academy of Sciences, Lanzhou 730000, China

10 <sup>3</sup>Key Laboratory of Surficial Geochemistry, Ministry of Education, School of Earth Sciences and Engineering, Nanjing University, Nanjing 210023, China

<sup>4</sup>Key Laboratory for Semi-Arid Climate Change of the Ministry of Education, College of Atmospheric Sciences, Lanzhou University, Lanzhou 730000, China

<sup>5</sup>CAS Center for Excellence in Tibetan Plateau Earth Sciences, Beijing 100101, China

<sup>6</sup>University of Chinese Academy of Sciences, Beijing 100049, China

15 *Correspondence to:* Zhiyuan Cong (zhiyuancong@itpcas.ac.cn) or Shichang Kang (shichang.kang@lzb.ac.cn)

**Abstract.** As an important constituent of light-absorbing impurities on the glacier surface, iron oxides influence the radiative properties of mineral dust and thus its radiative impact. In particular, the distinct optical properties between hematite and goethite highlight the necessity to obtain accurate knowledge about their abundance and geochemical behaviour. Cryoconite samples from five glaciers in different regions of the Tibetan Plateau (TP) and surroundings were studied. The iron abundance in the cryoconite from TP glaciers ranged from 3.40% to 4.90% by mass, in accordance to typical natural background level. Because the light-absorption capacity of mineral dust essentially depends on the presence of iron oxides (i.e. free iron), iron oxides were extracted and determined using diffuse reflectance spectroscopy. The ratios of free to total iron for the five glaciers ranged from 0.31 to 0.70, emphasizing that iron in the form of oxides should be considered rather than total iron in the albedo and radiative modelling. Furthermore, the goethite content in iron oxides (in mass fraction) ranged from 81% to 98%, showing that goethite is the predominant form among the glaciers. Using the abundance and speciation of iron oxides as well as their optical properties, the total light absorption were quantitatively attributed to goethite, hematite, black carbon and organic matters at 450 nm and 600 nm wavelengths. We found that the goethite played a stronger role than BC at shorter wavelength for most glaciers. Such findings are essential to understand the relative significance of anthropogenic/natural effect, and then taking the proper mitigation measures.

## 1 Introduction

35 The light-absorbing impurities (LAIs) in glaciers can significantly reduce the surface albedo of snowpack and absorb more solar energy (Warren and Wiscombe, 1985). LAIs were recognized as a major contributor to the glacier and ice sheet melting (Qian et al., 2015 and references therein), along

with the rising air temperatures (IPCC, 2014). The composition of LAIs on the glacier surface is very complex. Their major constituents include black carbon, brown carbon, mineral dust, as well as biogenic matter (Baccolo et al., 2017; Kaspari et al., 2015; Pu et al., 2017; Takeuchi, 2002). The complex of LAIs is particularly the case for the mountain glaciers in Himalayas and Tibetan Plateau (TP) (Fig. 1). Their surfaces are commonly covered by incoherent impurities (granular sediment) with dark color, which was termed as cryoconite (Baccolo et al., 2017; Dong et al., 2016).

Presently, tremendous attention has been paid to the black carbon (Kaspari et al., 2011; Wang et al., 2015; Yasunari et al., 2010), mainly because the cryosphere region of TP is in the vicinity of intensive BC source region, e.g. South Asia (Cong et al., 2015). In contrast, few research focus on dust in this region despite dust is apparently the predominant constituent of impurities on the glacier surface, especially in its ablation area (Qian et al., 2015). Based on field research at Mera Glacier of Nepal Himalayas, Kaspari et al. (2014) pointed out that when dust loading is high, the snow albedo reduction and subsequent radiative forcing caused by dust will overwhelm the impact related to black carbon.

To quantify the relative contribution of dust and black carbon as well as other substances is challenging (Painter et al., 2010). In the snow albedo simulation models like SNICAR (Flanner and Zender, 2006), dust concentration (micrograms of dust per gram of ice) was employed to represent the loading of dust, without considering the dust composition. Actually, the light-absorption capacity of dust essentially depends on the presence of iron oxides (also commonly termed as “free iron”) (Alfaro et al., 2004; Formenti et al., 2014; Moosmüller et al., 2012; Shi et al., 2012). The most common iron oxide species in mineral dust are hematite ( $\text{Fe}_2\text{O}_3$ ) and goethite ( $\text{FeO}(\text{OH})$ ), which have distinct optical properties in terms of absorption and wavelength dependence (Balsam et al., 2014). At the same time, some parts of iron are incorporated into the crystal lattice of alumino-silicates (defined as structural iron), and they do not contribute to the absorption of solar light (Lafon et al., 2006).

Up to now, the iron abundance and especially its mineral phases in glacial area are not well understood (Hawkings et al., 2018; Shahgedanova et al., 2013). The degree to which iron oxides contribute to solar absorption and reduction of snow albedo remains uncertain. To constrain the uncertainties of estimating the radiative forcing of cryoconite, particularly in the Tibetan Plateau glacier area, we designed this research to address several key issues. Firstly, what is the abundance of iron in the cryoconite of mountain glaciers? How much fraction of the total iron exists as iron oxides with efficient light-absorption capability? What is the relatively proportion of hematite and goethite, considering their distinct optical characteristics? What is their spatial variation in different types of glacier? Furthermore, how do the iron oxides impact the absorbing properties of cryoconite?

## 2 Field sampling and laboratory measurements

### 2.1 Field sampling

In order to consider geographic variability, five glaciers in different regions of TP and surroundings were chosen for the cryoconite sampling (Fig. 2). A detailed descriptions of the collection sites is given in Table 1. The Urumqi No. 1 Glacier (hereafter donated as UG,  $43^{\circ}06'N$ ,  $86^{\circ}49'E$ ) presents two

branches covering 1.646 km<sup>2</sup>. It is located in eastern Tien Shan. The air circulation regime there is dominated by the westerlies in summer and by the influence of the Siberian High during winter (Wang et al., 2014). Laohugou Glacier (LHG, 39°28'N, 96°32'E), with a length of 10 km and an area of 20 km<sup>2</sup>, is at the northern slope of western Qilian Mountains with typical continental climatic conditions (Dong et al., 2014). That area is surrounded by large sandy deserts in Northwest China, like Taklimakan Desert to the west, Qaidam Basin to the southwest and the Gobi Desert to the north. Xiaodongkemadi Glacier (XDK, 33°03'N, 92°04'E) is located on the northern slope of Tanggula Mountains, at the center of Tibetan Plateau. Previous studies showed that Tanggula Mountains represent the northern boundary of the area influenced by the South Asian monsoon. Palong #4 Glacier (PL, 29°15'N, 96°56' E), located in the southeast Tibetan Plateau, is a typical temperate glacier. It is strongly influenced by the South Asian summer monsoon intruding via the Brahmaputra Valley, and it is characterized by high accumulation (2500-3000 mm) and ablation rates on an annual scale (Yang et al., 2015). Baishui No. 1 Glacier (BS, 27°6'N, 100°11'E), with a length 2.26 km and an area 1.32 km<sup>2</sup>, is the largest glacier in the Yulong Mountains, at the southeastern edge of Tibetan Plateau. It is characterized by high precipitation, low snow line, and relatively high temperatures (equilibrium line mean annual value -6 °C, summer value 1-5 °C) (Niu et al., 2013).

Cryoconite samples were collected using a stainless-steel scoop on the surfaces of five glaciers described above. Samples were preserved in NALGENE HDPE wide-mouth bottles (500 ml) and kept in frozen until analysis. In the laboratory the cryoconite samples were freeze-dried, turning into powder for the subsequent determination. Therefore, in this work, concentrations and fractions are referred to dry cryoconite mass.

## 2.2 Elemental analysis by ICP-MS

A portion of cryoconite sample (about 20 mg) was dissolved under a laboratory hood using HF+HNO<sub>3</sub> mixture through three steps. In details, the sample was firstly transferred into PTFE high-pressure digestion vessel, and 1 mL HF and 1 ml HNO<sub>3</sub> were added. The digestion vessel was then ultrasonic treated for 20 min, and evaporated to nearly dry on a hot plate. Another 1 mL HF and 1 ml HNO<sub>3</sub> were added, and digested in an oven at 190 °C for 24 h. After cooling, the vessel was opened and evaporated to nearly dry again (on the plate at 150 °C), then followed by a second addition of HNO<sub>3</sub>. This procedure was repeated to wipe off the HF completely. Then 1mL HNO<sub>3</sub> and 3mL H<sub>2</sub>O were added to the vessel and put it into the oven for another 24h at 150 °C. After cooling, the final solution was diluted with pure water to about 50mL.

Eventually, it was measured by inductively coupled plasma-mass spectrometry (ICP-MS, Thermo X7, Thermo-Elemental Corp.) for Fe and other elements. Indium, Rhodium and Rhenium solution were used as internal standards. The accuracy and precision of trace elements was ascertained based on repeated measurement of the USGS Geochemical Reference Standard (Andesite, AGV-2). The measured and certified values for Fe agree well, with recovery better than 95%. The detailed description of the analytical protocol in our laboratory could be found in previous work (Wu et al., 2009).

### 2.3 Total organic carbon and black carbon

The contents of organic carbon were determined by a total carbon analyzer (TOC-V, Shimadzu). The accuracy of the TOC analysis was  $\pm 5\%$ . The separation and analysis of black carbon in the cryoconite were adopted from the procedures previously developed for sediments (Cong et al., 2013; Han et al., 2011). Specifically, the samples were first freeze-dried, grinded into powder and weighed. Then, HCl (2N) was added, to remove carbonates, silicates, and some kinds of metal oxides. The solution was centrifuged to remove the supernatants. Then mixture (1:2) of HCl (6N) and HF (48%) were added into the residue and reacted further. Finally, the residual solid was diluted with ultrapure water, filtered by quartz fiber filter with even distribution on their surface (QMA grade; Whatman International Ltd, England). The quartz filters were analyzed for BC using a DRI model 2001 carbon analyzer. For quality control, standard reference material (marine sediment, NIST SRM-1941b) was also analyzed (Cong et al., 2013). Our BC values compare well to the value reported by Han et al. (2007) ( $> 95\%$ ,  $n=5$ ), which indicates the analytical method used is reliable and repeatable.

### 2.4 Extraction and quantification of iron oxides

Cryoconite samples were treated with Citrate-Bicarbonate-Dithionite (CBD) method three times to completely extract iron oxides (Ji et al., 2002; Lafon et al., 2004; Mehra and Jackson, 1958). Then dissolved  $\text{Fe}^{3+}$  concentrations in the CBD solution were determined by a UV-2100 spectrophotometer (UNICO Inc., Shanghai) to obtain the iron mass in the form of oxides,  $\text{Fe}(\text{ox})$ , relevant to the light-absorption in the visible light. Uncertainties for the  $\text{Fe}(\text{ox})$  analysis were less than 5%. The remaining iron, i.e. the structural iron, was calculated by subtracting the  $\text{Fe}(\text{ox})$  from total iron.

$$\text{Fe}(\text{struc}) = \text{Fe}(\text{tot}) - \text{Fe}(\text{ox})$$

Here,  $\text{Fe}(\text{tot})$  is the total iron concentration achieved from ICP-MS elemental analysis.

### 2.5 Hematite/goethite measurement using Diffuse Reflectance Spectroscopy

Given the low abundance of Fe in the cryoconite, the speciation of iron oxides can not be achieved by traditional mineralogical analysis methods like X-ray diffraction (XRD). In this study, diffuse reflectance spectroscopy (DRS) was employed to distinguish and quantify hematite and goethite. Measurements were conducted using a Perkin-Elmer lambda 900 spectrophotometer (Perkin-Elmer Corp., Norwalk, CT) equipped with a diffuse reflectance attachment. Analyses were performed for spectra in the range from 400 to 700 nm with an interval of 2 nm. Detailed procedures have been well described previously (Ji et al., 2002; Lu et al., 2017). Hematite and goethite are the two main coloring agents in mineral dusts and are characterized by distinct colors, red and yellow, respectively. Hematite was chosen to be quantified rather than goethite, because hematite is a more intense (effective) coloring agent than goethite. The limit of detection for Hm can be as low as 0.01% by weight (Balsam et al., 2014; Deaton and Balsam, 1991; Ji et al., 2002; Lu et al., 2017).

A set of calibration samples containing known hematite were measured. Then the percent reflectance in red color band (630-700 nm, redness) was used as an independent variable in a transfer function for calculating hematite, which was established through regression as following:

$$Hm(\text{wt. \%}) = 1\text{E-}06 \cdot e^{27.37 \cdot \text{Redness}} \quad (R_{\text{adj}}^2 = 0.9301, \text{RMSE} = 0.3018)$$

- 5 Assuming the CBD-extracted Fe (in the form of iron oxides) are only constituted by hematite (Hm) and goethite (Gt), the content of goethite could be calculated using the following equation:

$$\text{Gt (wt. \%)} = 1.59 \times (\text{Fe}_{(\text{ox})} - \text{Hm}/1.43)$$

The reproducibility standard deviation of reflectance at all wavelengths was less than 0.15% (Lu et al., 2017).

## 10 2.6 Light absorption of cryoconite

Measurements of light absorption were performed using an ISSW spectrophotometer in Lanzhou University, China. The experimental strategy was mainly based on the method described by Doherty et al. (2010) and Wang et al. (2013). The ISSW measurement system are specially designed to be sensitive to light absorption and to avoid the interference of light scattering (Grenfell et al., 2011). The ISSW spectrophotometer could provide the spectral absorption properties of cryoconite, by weighting the transmitted light ( $I$ ) for a sample and that for a blank filter ( $I_0$ ). The relative attenuation ( $x_\lambda$ ) described by the natural logarithm of  $I_0/I$ :

$$x_\lambda = \ln[I_0(\lambda)/I(\lambda)] \quad (1)$$

The spectrum of light attenuation was further calibrated by a set of black carbon standards (fullerene soot, Alfa Aesar, Inc., Ward Hill, MA, USA) (Fig. S1). The light attenuation by samples on filter at specific wavelength will be converted to equivalent BC mass loading ( $L_{BC}$ ,  $\mu\text{g C cm}^{-2}$ ), which allows to calculate absorption optical depth  $\tau(\lambda)$  by cryoconite:  $\tau_\lambda = L_{BC}\beta_\lambda$ . Where  $\beta_\lambda$  is mass absorption coefficient (MAC) of standard black carbon (i.e., fullerene,  $6.3 \text{ m}^2 \text{ g}^{-1}$  at 550 nm) (Grenfell et al., 2011; Zhou et al., 2017). Then the light absorption capacity of cryoconite was calculated through dividing the absorption optical depth by the mass loading on filter:

$$\text{MAC} = \tau_\lambda / L \quad (2)$$

The absorption Ångström exponent (AAE) describes the wavelength dependence of the light absorption by particles (Ångström, 1929). The value of AAE could be obtained by the formula of:  $\text{AAE} = -\ln(\tau_1/\tau_2)/\ln(\lambda_1/\lambda_2)$ , where  $\tau_1$  and  $\tau_2$  are the light attenuation calculated at given wavelength  $\lambda_1$  and  $\lambda_2$ , respectively.

### 3 Results and discussion

#### 3.1 Organic carbon and black carbon contents

The total organic carbon and black carbon mass fractions of the cryoconite from the five glaciers are presented in Figure 3. The most striking feature was that BS exhibited the highest TOC content ( $9.70 \pm 0.99$  % in mass fraction), about 4 times higher than other four glaciers. Similarly, the BC in the cryoconite from BS were also significantly higher than other glaciers, i.e. UG, LHG, XDK and PL. For the black carbon concentration, BS glacier also has the highest abundance ( $1.99 \pm 0.28$ % in mass), indicating the strong anthropogenic (fossil fuel and biomass burning) influence there. For the remaining four glaciers, their black carbon contents were comparable, ranging from  $0.06 \pm 0.01$ % (in total mass of dried cryoconite) of XDK to  $0.13 \pm 0.03$ % of PL. For comparison, Di Mauro et al. (2017) reported the black carbon values in cryoconites from Morteratsch Glacier (Swiss Alps), with the range of 0.30 - 0.4 % in mass fraction.

#### 3.2 Abundance of elemental Fe (total) and free-Fe (iron oxides)

The iron contents found in cryoconite samples from UG, LHG, XDK, PL and BS glaciers averaged 4.62%, 4.28%, 3.40%, 4.18% and 4.90%, by mass, respectively (Figure 4). Our data were similar to the previous reported iron contents in dust particles preserved in ice cores across Tibetan Plateau (Wu et al., 2012), which ranged from 3.38% to 5.41%. The iron in the cryoconite on the TP glaciers represents a natural background level. Lower iron contents were found in the dust layers deposited on snow cover in northern Utah, USA (the Wasatch Range), which varied from 1.73 to 2.85% by mass (Reynolds et al., 2014). Given the scarce information of Fe abundance available in the glacier area, we also briefly summarized the data in mineral dust from various desert regions worldwide for comparison (Table 2). The determined Fe contents in desert aerosols from ZBT (ZhengBeiTai) and Yulin in North China were 5.38% and 7.7% in total dust aerosol mass, respectively, somewhat higher than our values of cryoconite over glaciers. The reported values of Fe content from Sahara and Arabian Peninsula generally varied in the range from 2.0 to 11% by mass (Gao et al., 2001; Gomes and Gillette, 1993; Zhang et al., 2015), depending on the locations and the transport process. In addition, in this study there was no systematic variation of the Fe concentrations with altitude, which indicated that the cryoconite on each glacier was homogeneous mixture.

Because only iron oxides (free iron) could effectively control the absorbing property of mineral materials, the content of free iron is more concerned in radiative and climate modelling. Table 2 shows the means of free and structural iron in cryoconite (percentage in total mass) from the five glaciers, with their standard deviations. Interesting, the highest value of total Fe and the highest free-to-total ratio were found in the samples from BS. The color of BS samples was darker than others visually, and they also present the highest TOC contents among the five glaciers (Fig. 3).

The ratios of free to total iron for the five glaciers ranged from 0.31 to 0.70 (Table 2). That means substantial Fe are trapped in the crystal lattice (i.e. structural Fe) and has no direct relationship with the

light absorption. This finding is generally in agreement with that of Lafon et al. (2004) for desert aerosols (Table 2). Namely, only about half total-iron is under the form of iron oxides. Therefore, our result clearly demonstrates that the total iron is not suitable to be directly used in the albedo and radiative modelling, although this has been a common practice in previous research (Kaspari et al., 2014; Wang et al., 2013). If this point was considered, the contribution of iron-containing minerals to the total light absorption on the glacier surface will decrease almost 50%, namely, the other light-absorbing components like black carbon and brown carbon should account for much larger fraction correspondingly.

### 3.3 The speciation of iron oxides

In previous modelling studies of the dust radiative forcing, hematite was usually assumed to be the major absorbing iron oxides (Sokolik and Toon, 1999). However, in this study goethite was found more abundant than hematite for all the five glaciers (Fig. 4 and Table 2). The goethite in total iron oxide mass ranged from 81% (for XDK) to 98% (for BS), showing that goethite is the predominant form of iron oxides. The ratios of goethite to hematite in our study were even higher than those reported for desert aerosols (Table 2) (Formenti et al., 2014; Lafon et al., 2006; Shen et al., 2006). For example, Lafon et al (2004) reported the iron oxides in the dust from Northwest China with about half of total iron in the form of iron oxides, and the abundance of goethite (73% of the total iron oxide mass) was higher than hematite (27%). Shen et al. (2006) determined comparable goethite/hematite composition data in dust aerosols from North China. i.e. 64% for goethite in total iron oxide mass and 36% for hematite in Dunhuang, 63% and 37% in Yulin, and 68% and 32% in Tongliao, respectively. While in the dust samples collected on the snow from American West (Wasatch Range, Utah), the amounts of goethite and hematite in dust samples were found roughly equal using Mössbauer spectroscopy (Reynolds et al., 2014).

Beside the pedogenic characteristics, the dominance of goethite over hematite may be also ascribed to the glacier surface environment. Goethite formation is favored in moist and cool conditions, while hematite commonly occurs in warm and dry environment (Reynolds et al., 2014). That is also why the ratios of goethite to hematite were frequently used as indicators of paleoclimate (e.g. precipitation and temperature) (Schwertmann, 1971). Taking into account the cold and humid conditions on the glacier surface, mineralogical transformation of hematite to goethite is highly expected to happen, resulting more goethite.

### 3.4 Contribution to light absorption by cryoconite components

Optical properties of goethite and hematite, including MAC and AAE parameters, are critical to assess their role in the light absorption. A wide range of MAC values have been reported in the literatures. According to the previous work by Alfaro (2004), the mass absorption coefficient of iron oxides (goethite : hematite, 73% : 27%) in dust from Northwest China desert was measured as  $0.56 \text{ m}^2 \text{ g}^{-1}$  at 660 nm, and it will increase about 6 times at shorter wavelength (325 nm) ( $\text{AAE} \approx 3$ ). This value was further employed to evaluate the albedo and radiative forcing effect of dust in snow of Himalayas



(Nepal) (Kaspari et al., 2014). Recently, Utry et al. (2015) reported the MAC value of hematite (purity > 95%) as  $0.54 \text{ m}^2 \text{ g}^{-1}$  at 532 nm, based on the measurements of a multi-wavelength photoacoustic instrument. Wang et al. (2013) choose the MAC of goethite of  $0.9 \text{ m}^2 \text{ g}^{-1}$  (550 nm) and AAE value of 3 to assess the contribution of mineral dust to the total absorption of LAIs in North China snow. Based on the laboratory experiments by ISSW, we determined Fe-specific absorption coefficient using the goethite (Stream Chemicals, Inc.) and hematite standard (Sigma Aldrich, Inc.) (Fig. 5). The calculated MAC values at 450 nm for goethite and hematite were  $1.55 \pm 0.08 \text{ m}^2 \text{ g}^{-1}$  and  $1.12 \pm 0.11 \text{ m}^2 \text{ g}^{-1}$ , respectively. And the MAC values at 600 nm were  $0.15 \pm 0.01 \text{ m}^2 \text{ g}^{-1}$  and  $0.55 \pm 0.03 \text{ m}^2 \text{ g}^{-1}$ , respectively.

Here we assumed that the total light absorption was entirely and exclusively caused by three components, i.e. iron oxides (goethite and hematite), BC and organic matters. Compared to dust and black carbon, the composition and sources of organic matters over the glacier surface are complicated. Organic matter was a mixture of soil humic and humic-like matters, biogenic particles (e.g., algae, fungi and plant debris) and biomass/fossil fuel burning emissions (Wu et al., 2016), which are often termed as brown carbon (BrC). Considering its diverse sources and complex composition, in this work we did not assume the specific optical parameters for organic matters. Instead, the relative contributions to absorption by organic matters were obtained by subtracting the portions by iron oxides and black carbon from the total absorption. The optical properties of the latter two components are much certain than light absorbing organics. The mass absorption efficiency and AAE value of BC were assumed to be  $6.3 \text{ m}^2 \text{ g}^{-1}$  (550 nm) and 1.1, respectively (Grenfell et al., 2011).

Because the light absorption capability of iron oxides and organic matters vary with wavelength, here we calculated the relative absorption of these three components at 450 nm and 600 nm, respectively. As shown in Figure 6, at 600 nm (the right panel), the organic matters dominated the light absorption. And BC was the second contributor to the light absorption, especially for the BS glacier with the highest BC concentration. However, the contribution of iron oxides increases dramatically at 450 nm, especially for goethite, due to their high light absorption ability at short wavelength. For the glaciers except BS, the absorption by goethite was larger than BC and approximately equal to organic matters. The increased contribution by goethite at the shorter wavelength was due to its large AAE value (Zhou et al., 2017), which indicated stronger light absorption at short wavelength. While the relative contribution to absorption by hematite appeared to be constant between different wavelengths.

In general, goethite plays a stronger role at shorter band, causing higher fraction of light absorption than BC. Although iron oxides are much less absorbing than black carbon per unit mass, the much high mass concentration of mineral dust in the natural environment may result in total absorption be larger than BC.

#### 4. Summary and Conclusions

The degree to which mineral dust, especially iron oxides, affect the solar absorption and decreases of snow albedo remain uncertain. Despite their importance, the content and speciation of iron oxides in the cryoconite over the glacial surface has not been reported previously.

The iron abundances in the cryoconite from TP glaciers ranged from 3.40% to 4.90% by mass, which were comparable to the upper continental crust (UCC) composition (3.5% of Fe) (Taylor and McLennan, 1995) and implied their natural sources. We further separated and determined iron oxides (free Fe) using the Citrate-Bicarbonate-Dithionite method. The ratios of free to total iron for the five glaciers ranged from 0.31 to 0.70. That means substantial amounts of Fe are trapped in the crystal lattice (i.e. structural Fe) and has no direct influence on the light absorption. Our result clearly demonstrated that the total iron was not suitable to be directly used in the albedo and radiative modelling, although this is a common practice in previous studies. The iron oxides were further quantified into goethite and hematite, the two major species. The goethite content in iron oxides (in mass fraction) ranged from 81% (XDK) to 98% (BS), showing that goethite is the predominant form of iron oxides.

Taking account of both the abundance of iron oxides and their optical properties, the total light absorption were quantitatively attributed to goethite, hematite, BC and organic matters at 450 nm and 600 nm. Organic matters were found to be the most important light absorber at 450 nm and 650 nm wavelengths. We demonstrated that the goethite played a stronger role than BC at shorter wavelength (i.e. 450 nm) for glaciers except Baishui (BS) glacier. Baishui glacier is closely adjacent to the intensive human activities area, and receives more BC from the emission there. In general, this research provided new observations of the iron-oxides in glaciers, and the results are meaningful for understanding their role on mountain glacier surfaces in Himalayas and Tibetan Plateau, a climate sensitive and environmentally fragile region.

### Acknowledgements

We deeply thank Wei YANG, Yajun LIU, Hewen NIU, Junming GUO, Zhiwen DONG, Xiaofei LI, Yang LI and other team members for their contribution in the field sampling. This work is supported by National Science Foundation of China under Grants 41522103, 41522505, 41225002 and 41673095. The data used are listed in the references, tables, and supplements.

### References

- Alfaro, S. C., Lafon, S., Rajot, J. L., Formenti, P., Gaudichet, A., and Maille, M.: Iron oxides and light absorption by pure desert dust: An experimental study, *Journal of Geophysical Research-Atmospheres*, 109, 2004.
- Ångström, A.: On the atmospheric transmission of sun radiation and on dust in the air, *Geografiska Annaler*, 11, 156-166, 1929.
- Baccolo, G., Di Mauro, B., Massabò, D., Clemenza, M., Nastasi, M., Delmonte, B., Prata, M., Prati, P., Previtali, E., and Maggi, V.: Cryoconite as a temporary sink for anthropogenic species stored in glaciers, *Scientific Reports*, 7, 9623, 2017.

- Balsam, W., Ji, J., Renock, D., Deaton, B. C., and Williams, E.: Determining hematite content from NUV/Vis/NIR spectra: Limits of detection, *American Mineralogist*, 99, 2280-2291, 2014.
- Cong, Z., Kang, S., Gao, S., Zhang, Y., Li, Q., and Kawamura, K.: Historical trends of atmospheric black carbon on Tibetan Plateau as reconstructed from a 150-year lake sediment record, *Environmental Science & Technology*, 5 47, 2579-2586, 2013.
- Cong, Z., Kang, S., Kawamura, K., Liu, B., Wan, X., Wang, Z., Gao, S., and Fu, P.: Carbonaceous aerosols on the south edge of the Tibetan Plateau: concentrations, seasonality and sources, *Atmospheric Chemistry and Physics*, 15, 1573-1584, 2015.
- Deaton, B. C. and Balsam, W. L.: Visible spectroscopy--a rapid method for determining hematite and goethite concentration in geological materials, *Journal of Sedimentary Research*, 61, 1991.
- Di Mauro, B., Baccolo, G., Garzonio, R., Giardino, C., Massabò, D., Piazzalunga, A., Rossini, M., and Colombo, R.: Impact of impurities and cryoconite on the optical properties of the Morteratsch Glacier (Swiss Alps), *The Cryosphere*, 11, 2393-2409, 2017.
- Doherty, S. J., Warren, S. G., Grenfell, T. C., Clarke, A. D., and Brandt, R. E.: Light-absorbing impurities in Arctic snow, *Atmospheric Chemistry and Physics*, 10, 11647-11680, 2010.
- Dong, Z., Kang, S., Qin, D., Li, Y., Wang, X., Ren, J., Li, X., Yang, J., and Qin, X.: Provenance of cryoconite deposited on the glaciers of the Tibetan Plateau: New insights from Nd-Sr isotopic composition and size distribution, *Journal of Geophysical Research: Atmospheres*, 121, 7371-7382, 2016.
- Dong, Z., Qin, D., Chen, J., Qin, X., Ren, J., Cui, X., Du, Z., and Kang, S.: Physicochemical impacts of dust particles on alpine glacier meltwater at the Laohugou Glacier basin in western Qilian Mountains, China, *Science of The Total Environment*, 493, 930-942, 2014.
- Flanner, M. G. and Zender, C. S.: Linking snowpack microphysics and albedo evolution, *Journal of Geophysical Research-Atmospheres*, 111, 2006.
- Formenti, P., Caquineau, S., Chevaillier, S., Klaver, A., Desboeufs, K., Rajot, J.-L., Belin, S., and Briois, V.: Dominance of goethite over hematite in iron oxides of mineral dust from Western Africa: Quantitative partitioning by X-ray absorption spectroscopy, *Journal of Geophysical Research: Atmospheres*, 119, DOI: 10.1002/2014JD021668, 2014.
- Gao, Y., Kaufman, Y., Tanre, D., Kolber, D., and Falkowski, P.: Seasonal distributions of aeolian iron fluxes to the global ocean, *Geophysical Research Letters*, 28, 29-32, 2001.

- Gomes, L. and Gillette, D. A.: A comparison of characteristics of aerosol from dust storms in central Asia with soil-derived dust from other regions, *Atmospheric Environment. Part A. General Topics*, 27, 2539-2544, 1993.
- Grenfell, T. C., Doherty, S. J., Clarke, A. D., and Warren, S. G.: Light absorption from particulate impurities in snow and ice determined by spectrophotometric analysis of filters, *Applied Optics*, 50, 2037-2048, 2011.
- 5 Han, Y., Cao, J., An, Z., Chow, J. C., Watson, J. G., Jin, Z., Fung, K., and Liu, S.: Evaluation of the thermal/optical reflectance method for quantification of elemental carbon in sediments, *Chemosphere*, 69, 526-533, 2007.
- Han, Y. M., Cao, J. J., Yan, B. Z., Kenna, T. C., Jin, Z. D., Cheng, Y., Chow, J. C., and An, Z. S.: Comparison of Elemental Carbon in Lake Sediments Measured by Three Different Methods and 150-Year Pollution History in  
10 Eastern China, *Environmental science & technology*, 45, 5287-5293, 2011.
- Hawkings, J. R., Benning, L. G., Raiswell, R., Kaulich, B., Araki, T., Abyaneh, M., Stockdale, A., Koch-Müller, M., Wadham, J. L., and Tranter, M.: Biolabile ferrous iron bearing nanoparticles in glacial sediments, *Earth and Planetary Science Letters*, 493, 92-101, 2018.
- IPCC: Climate change 2013: the physical science basis: Working Group I contribution to the Fifth assessment  
15 report of the Intergovernmental Panel on Climate Change, Cambridge University Press, 2014.
- Ji, J. F., Balsam, W., Chen, J., and Liu, L. W.: Rapid and quantitative measurement of hematite and goethite in the Chinese loess-paleosol sequence by diffuse reflectance spectroscopy, *Clays and Clay Minerals*, 50, 208-216, 2002.
- Kaspari, S., Painter, T. H., Gysel, M., Skiles, S. M., and Schwikowski, M.: Seasonal and elevational variations of black carbon and dust in snow and ice in the Solu-Khumbu, Nepal and estimated radiative forcings, *Atmospheric  
20 Chemistry and Physics*, 14, 8089-8103, 2014.
- Kaspari, S., Skiles, S. M., Delaney, I., Dixon, D., and Painter, T. H.: Accelerated glacier melt on Snow Dome, Mount Olympus, Washington, USA, due to deposition of black carbon and mineral dust from wildfire, *Journal of Geophysical Research-Atmospheres*, 120, 2793-2807, 2015.
- Kaspari, S. D., Schwikowski, M., Gysel, M., Flanner, M. G., Kang, S., Hou, S., and Mayewski, P. A.: Recent  
25 increase in black carbon concentrations from a Mt. Everest ice core spanning 1860-2000 AD, *Geophysical Research Letters*, 38, 2011.
- Lafon, S., Rajot, J. L., Alfaro, S. C., and Gaudichet, A.: Quantification of iron oxides in desert aerosol, *Atmospheric Environment*, 38, 1211-1218, 2004.

- Lafon, S., Sokolik, I. N., Rajot, J. L., Caquineau, S., and Gaudichet, A.: Characterization of iron oxides in mineral dust aerosols: Implications for light absorption, *Journal of Geophysical Research-Atmospheres*, 111, 2006.
- Lu, W., Zhao, W., Balsam, W., Lu, H., Liu, P., Lu, Z., and Ji, J.: Iron Mineralogy and Speciation in Clay-Sized Fractions of Chinese Desert Sediments, *Journal of Geophysical Research: Atmospheres*, 2017. 2017.
- 5 Mehra, O. and Jackson, M.: Iron oxide removal from soils and clays by a dithionite–citrate system buffered with sodium bicarbonate, 1958, 317-327.
- Moosmüller, H., Engelbrecht, J. P., Skiba, M., Frey, G., Chakrabarty, R. K., and Arnott, W. P.: Single scattering albedo of fine mineral dust aerosols controlled by iron concentration, *Journal of Geophysical Research: Atmospheres* 117, doi:10.1029/2011JD016909, 2012.
- 10 Niu, H., He, Y., Zhu, G., Xin, H., Du, J., Pu, T., Lu, X., and Zhao, G.: Environmental implications of the snow chemistry from Mt. Yulong, southeastern Tibetan Plateau, *Quaternary International*, 313–314, 168-178, 2013.
- Painter, T. H., Deems, J. S., Belnap, J., Hamlet, A. F., Landry, C. C., and Udall, B.: Response of Colorado River runoff to dust radiative forcing in snow, *Proceedings of the National Academy of Sciences of the United States of America*, 107, 17125-17130, 2010.
- 15 Pu, W., Wang, X., Wei, H., Zhou, Y., Shi, J., Hu, Z., Jin, H., and Chen, Q.: Properties of black carbon and other insoluble light-absorbing particles in seasonal snow of northwestern China, *The Cryosphere*, 11, 1213-1233, 2017.
- Qian, Y., Yasunari, T. J., Doherty, S. J., Flanner, M. G., Lau, W. K. M., Ming, J., Wang, H., Wang, M., Warren, S. G., and Zhang, R.: Light-absorbing Particles in Snow and Ice: Measurement and Modeling of Climatic and Hydrological impact, *Advances in Atmospheric Sciences*, 32, 64-91, 2015.
- 20 Reynolds, R. L., Goldstein, H. L., Moskowitz, B. M., Bryant, A. C., Skiles, S. M., Kokaly, R. F., Flagg, C. B., Yauk, K., Berquo, T., Breit, G., Ketterer, M., Fernandez, D., Miller, M. E., and Painter, T. H.: Composition of dust deposited to snow cover in the Wasatch Range (Utah, USA): Controls on radiative properties of snow cover and comparison to some dust-source sediments, *Aeolian Research*, 15, 73-90, 2014.
- Schlitzer, R., 2017.
- 25 Schwertmann, U.: Transformation of Hematite to Goethite in Soils, *Nature*, 232, 624-625, 1971.
- Shahgedanova, M., Kutuzov, S., White, K. H., and Nosenko, G.: Using the significant dust deposition event on the glaciers of Mt. Elbrus, Caucasus Mountains, Russia on 5 May 2009 to develop a method for dating and "provenancing" of desert dust events recorded in snow pack, *Atmos. Chem. Phys.*, 13, 1797-1808, 2013.

- Shen, Z. X., Cao, J. J., Zhang, X. Y., Arimoto, R., Ji, J. F., Balsam, W. L., Wang, Y. Q., Zhang, R. J., and Li, X. X.: Spectroscopic analysis of iron-oxide minerals in aerosol particles from northern China, *Science of The Total Environment*, 367, 899-907, 2006.
- Shi, Z., Krom, M. D., Jickells, T. D., Bonneville, S., Carslaw, K. S., Mihalopoulos, N., Baker, A. R., and Benning, L. G.: Impacts on iron solubility in the mineral dust by processes in the source region and the atmosphere: A review, *Aeolian Research*, 5, 21-42, 2012.
- Sokolik, I. N. and Toon, O. B.: Incorporation of mineralogical composition into models of the radiative properties of mineral aerosol from UV to IR wavelengths, *Journal of Geophysical Research: Atmospheres*, 104, 9423-9444, 1999.
- 10 Takeuchi, N.: Optical characteristics of cryoconite (surface dust) on glaciers: the relationship between light absorbency and the property of organic matter contained in the cryoconite. In: *Annals of Glaciology*, Vol 34, 2002, Winther, J. G. and Solberg, R. (Eds.), *Annals of Glaciology*, 2002.
- Taylor, S. R. and McLennan, S. M.: The geochemical evolution of the continental crust, *Reviews of Geophysics*, 33, 241-265, 1995.
- 15 Utry, N., Ajtai, T., Pinter, M., Tombacz, E., Illes, E., Bozoki, Z., and Szabo, G.: Mass-specific optical absorption coefficients and imaginary part of the complex refractive indices of mineral dust components measured by a multi-wavelength photoacoustic spectrometer, *Atmospheric Measurement Techniques*, 8, 401-410, 2015.
- Wang, M., Xu, B., Kaspari, S. D., Gleixner, G., Schwab, V. F., Zhao, H., Wang, H., and Yao, P.: Century-long record of black carbon in an ice core from the Eastern Pamirs: Estimated contributions from biomass burning, *Atmospheric Environment*, 115, 79-88, 2015.
- 20 Wang, P., Li, Z., Li, H., Wang, W., and Yao, H.: Comparison of glaciological and geodetic mass balance at Urumqi Glacier No. 1, Tian Shan, Central Asia, *Global and Planetary Change*, 114, 14-22, 2014.
- Wang, X., Doherty, S. J., and Huang, J.: Black carbon and other light-absorbing impurities in snow across Northern China, *Journal of Geophysical Research-Atmospheres*, 118, 1471-1492, 2013.
- 25 Warren, S. G. and Wiscombe, W. J.: Dirty snow after nuclear war, *Nature*, 313, 467-470, 1985.
- Wu, G., Xu, B., Zhang, C., Gao, S., and Yao, T.: Geochemistry of dust aerosol over the Eastern Pamirs, *Geochimica Et Cosmochimica Acta*, 73, 977-989, 2009.
- Wu, G., Zhang, C., Li, Z., Zhang, X., and Gao, S.: Iron content and solubility in dust from high-alpine snow along a north-south transect of High Asia, 2012, 64, 2012.

Wu, G.-M., Cong, Z.-Y., Kang, S.-C., Kawamura, K., Fu, P.-Q., Zhang, Y.-L., Wan, X., Gao, S.-P., and Liu, B.: Brown carbon in the cryosphere: Current knowledge and perspective, *Advances in Climate Change Research*, 7, 82-89, 2016.

5 Yang, W., Guo, X., Yao, T., Zhu, M., and Wang, Y.: Recent accelerating mass loss of southeast Tibetan glaciers and the relationship with changes in macroscale atmospheric circulations, *Climate Dynamics*, doi: 10.1007/s00382-015-2872-y, 2015. 1-11, 2015.

10 Yasunari, T. J., Bonasoni, P., Laj, P., Fujita, K., Vuillemoz, E., Marinoni, A., Cristofanelli, P., Duchi, R., Tartari, G., and Lau, K. M.: Estimated impact of black carbon deposition during pre-monsoon season from Nepal Climate Observatory – Pyramid data and snow albedo changes over Himalayan glaciers, *Atmos. Chem. Phys.*, 10, 6603-6615, 2010.

Zhang, X. L., Wu, G. J., Zhang, C. L., Xu, T. L., and Zhou, Q. Q.: What is the real role of iron oxides in the optical properties of dust aerosols?, *Atmos. Chem. Phys.*, 15, 12159-12177, 2015.

Zhou, Y., Wang, X., Wu, X., Cong, Z., Wu, G., and Ji, M.: Quantifying Light Absorption of Iron Oxides and Carbonaceous Aerosol in Seasonal Snow across Northern China, *Atmosphere*, 8, 63, 2017.

15

**Table 1 Summary of cryoconite samples collected from five glaciers over Tibetan Plateau and surroundings.**

| <b>Glacier</b>                 | <b>Description</b> | <b>Coordinates</b> | <b>Elevation (m, a.s.l.)</b> | <b>Sampling date</b> | <b>Sample Number</b> |
|--------------------------------|--------------------|--------------------|------------------------------|----------------------|----------------------|
| <b>Urumqi #1 Glacier (UG)</b>  | Tienshan Mount.    | 43°06'N, 86°48' E  | 3800-4000                    | Aug. 2014            | 14                   |
| <b>LaoHuGou (LHG)</b>          | Qilian Mount.      | 39°28'N, 96°32' E  | 4300-4900                    | Jul. 2014            | 14                   |
| <b>Xiaodongkemadi (XDK)</b>    | Tanggula Mount.    | 33°03'N, 92°04' E  | 5400-5600                    | Aug. 2014            | 6                    |
| <b>PaLong #4 (PL)</b>          | Southeast TP       | 29°15'N, 96°56' E  | 4700                         | Sep. 2015            | 2                    |
| <b>Baishui #1 Glacier (BS)</b> | YuLong             | 27°6'N , 100°11' E | 4600-4800                    | Aug. 2014            | 9                    |



**Table 2 The abundances (by mass) of total iron, free iron, hematite, goethite and their ratios determined in cryoconites from TP glaciers, as well as other data available in the literatures.**

| Locations            | Description    | Total iron (%)                   | Free iron (%)       | Free-total iron ratio | Hematite %             | Goethite %             | Gt-Hm ratio           | References             |
|----------------------|----------------|----------------------------------|---------------------|-----------------------|------------------------|------------------------|-----------------------|------------------------|
| <b>UG</b>            |                | 4.62 ( $\pm 0.22$ ) <sup>a</sup> | 1.41 ( $\pm 0.29$ ) | 0.31 ( $\pm 0.07$ )   | 0.24 ( $\pm 0.02$ )    | 1.98 ( $\pm 0.47$ )    | 8.26 ( $\pm 2.27$ )   | This study             |
| <b>LHG</b>           |                | 4.28 ( $\pm 0.17$ )              | 1.50 ( $\pm 0.30$ ) | 0.35 ( $\pm 0.07$ )   | 0.28 ( $\pm 0.02$ )    | 2.08 ( $\pm 0.48$ )    | 7.54 ( $\pm 1.83$ )   | This study             |
| <b>XDK</b>           | Cryoconite     | 3.40 ( $\pm 0.18$ )              | 1.93 ( $\pm 0.48$ ) | 0.56 ( $\pm 0.12$ )   | 0.56 ( $\pm 0.08$ )    | 2.44 ( $\pm 0.69$ )    | 4.30 ( $\pm 0.90$ )   | This study             |
| <b>PL</b>            |                | 4.18( $\pm 0.13$ )               | 1.53( $\pm 0.28$ )  | 0.37( $\pm 0.08$ )    | 0.23( $\pm 0.01$ )     | 2.18( $\pm 0.44$ )     | 9.63( $\pm 1.88$ )    | This study             |
| <b>BS</b>            |                | 4.90 ( $\pm 0.21$ )              | 3.43 ( $\pm 0.53$ ) | 0.70 ( $\pm 0.10$ )   | 0.10 ( $\pm 0.01$ )    | 5.35 ( $\pm 0.85$ )    | 55.2 ( $\pm 10.4$ )   | This study             |
| <b>Utah, USA</b>     | Dust on snow   | 1.73-2.85                        |                     |                       |                        |                        | $\sim 1$ <sup>b</sup> | Reynolds et al. (2014) |
| <b>Niger, Sahara</b> | Desert Aerosol | 6.3 ( $\pm 0.9$ )                | 2.8 ( $\pm 0.8$ )   | 0.44 ( $\pm 0.11$ )   |                        |                        |                       | Lafon et al. (2004)    |
| <b>Niger, Sahel</b>  | Desert Aerosol | 7.8 ( $\pm 0.4$ )                | 5.0 ( $\pm 0.4$ )   | 0.65 ( $\pm 0.04$ )   |                        |                        |                       | Lafon et al. (2004)    |
| <b>Yulin, China</b>  | Desert Aerosol | 7.7 ( $\pm 0.3$ )                | 3.7 ( $\pm 0.4$ )   | 0.48 ( $\pm 0.03$ )   |                        |                        |                       | Lafon et al. (2004)    |
| <b>ZBT, China</b>    | Desert aerosol | 5.38 ( $\pm 0.2$ )               | 3.0 ( $\pm 0.2$ )   | 0.43 ( $\pm 0.01$ )   |                        |                        | $\sim 3.0$            | Lafon et al. (2006)    |
| <b>West Africa</b>   | Desert Aerosol |                                  |                     | 0.38-0.72             | 0.09-0.26 <sup>c</sup> | 0.21-0.49 <sup>c</sup> | 0.96-3.1              | Formenti et al. (2014) |

<sup>a</sup> Values in brackets represent the standard deviations; <sup>b</sup> Mössbauer spectroscopy indicated roughly equal amounts of hematite and goethite, while reflectance spectroscopy showed goethite was dominant iron oxides; <sup>c</sup> Using X-ray absorption (XAS). Note: the total and free iron data in this table were obtained from ICP-MS, so it refers to the elemental Fe. While hematite and goethite were measured as Fe oxides.

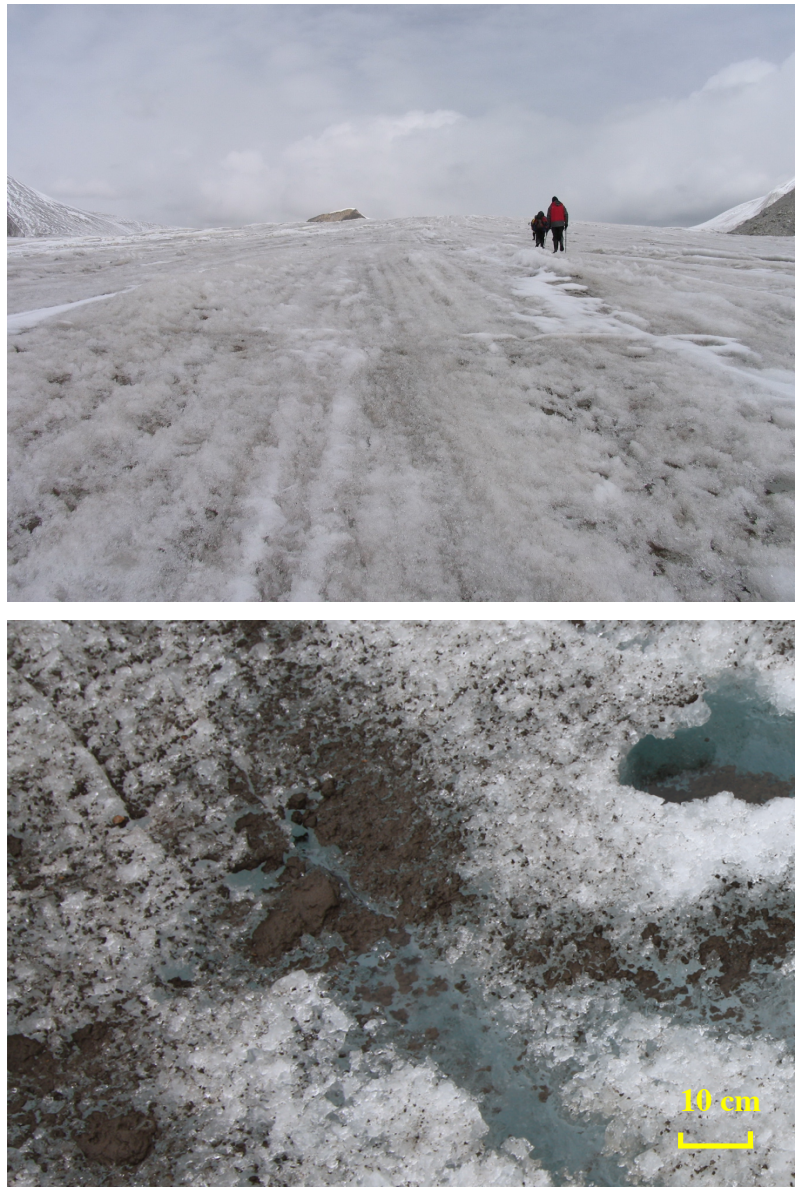

**Fig. 1** Surface of mountain glacier (upper) in central Tibetan Plateau and dispersed cryoconite (down) on it.

5

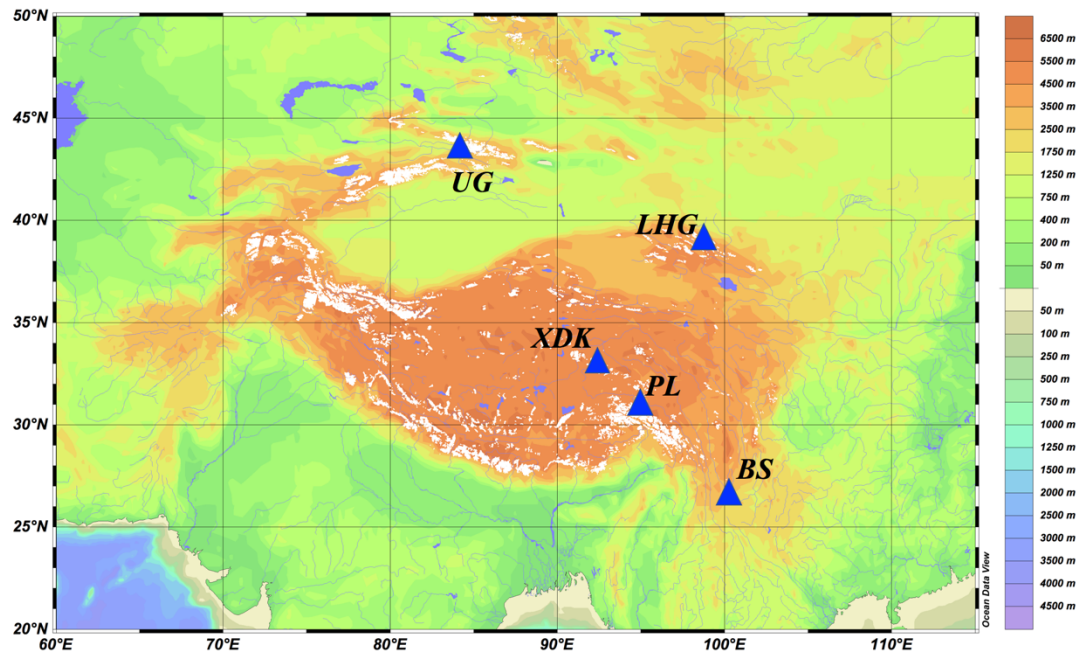

**Fig. 2** Topographic map of the Tibetan Plateau and surrounding, with locations of five representative glaciers. Note: the base map was created by Ocean Data View software (Schlitzer, 2017).

5

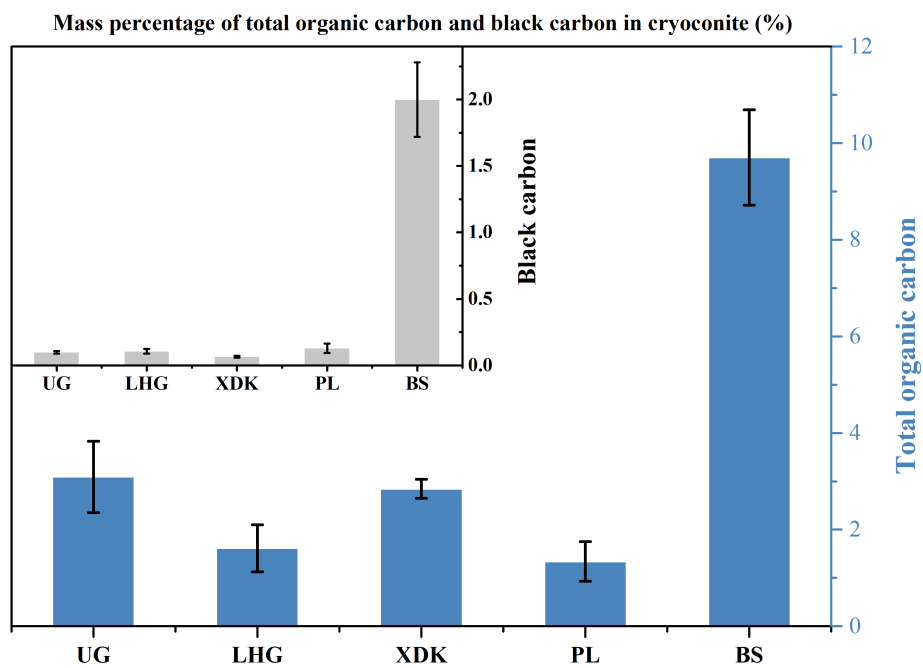

**Fig. 3 The total organic carbon (blue) and black carbon (grey) in the total mass of cryoconites on the mountain glaciers of Tibetan Plateau and surroundings.**

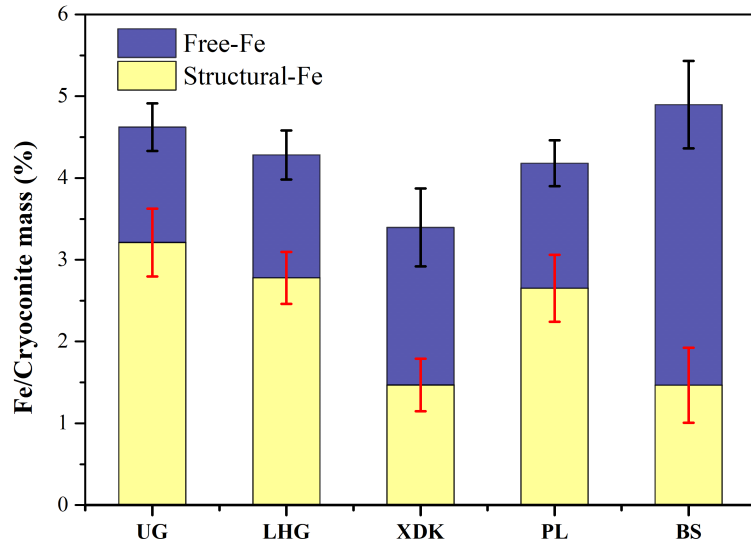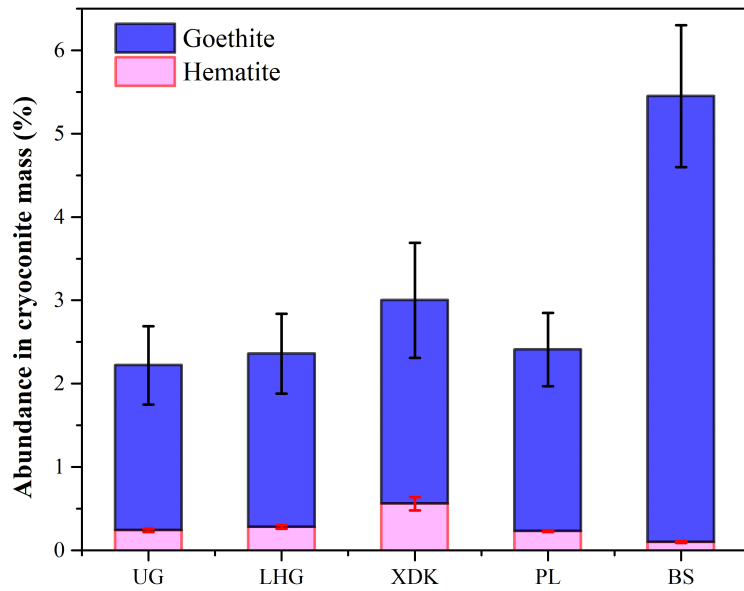

5

**Fig. 4** The free iron and structural iron contents (elemental Fe) measured in the total cryoconite (dried) mass from TP glaciers (Upper), and goethite and hematite (Fe oxides) contents in the total cryoconite mass (Bottom).

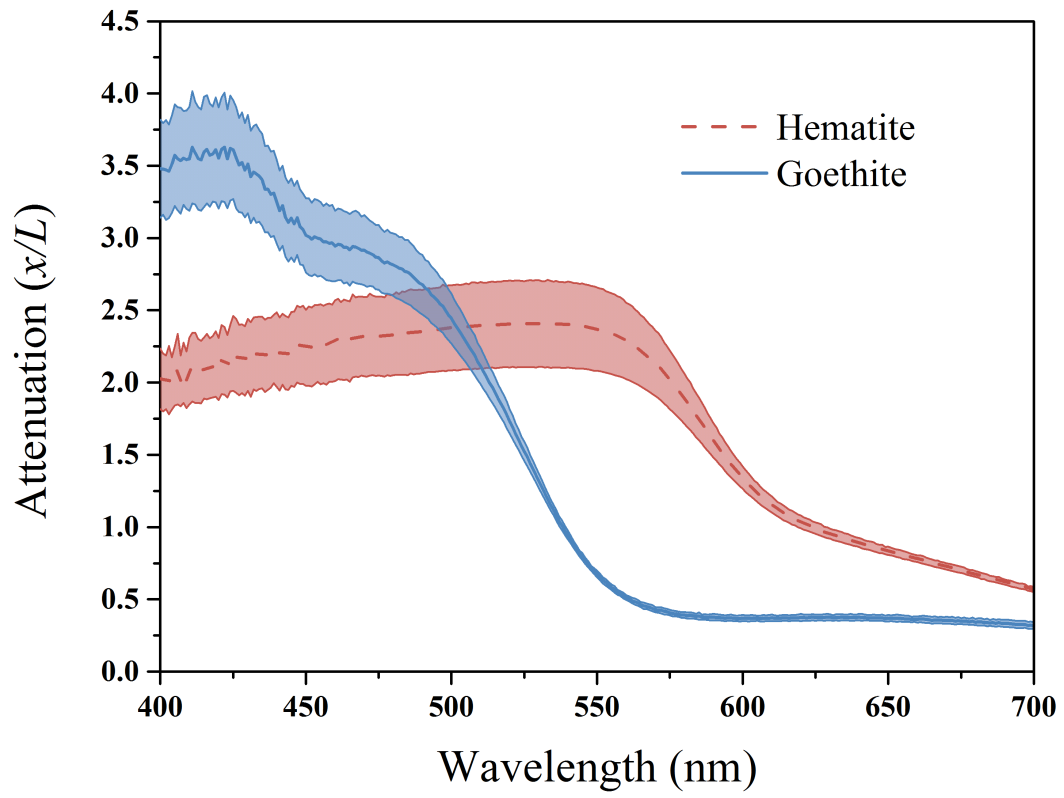

Fig. 5 The mass weighted light attenuation by hematite and goethite. Error bars indicate the standard deviation.

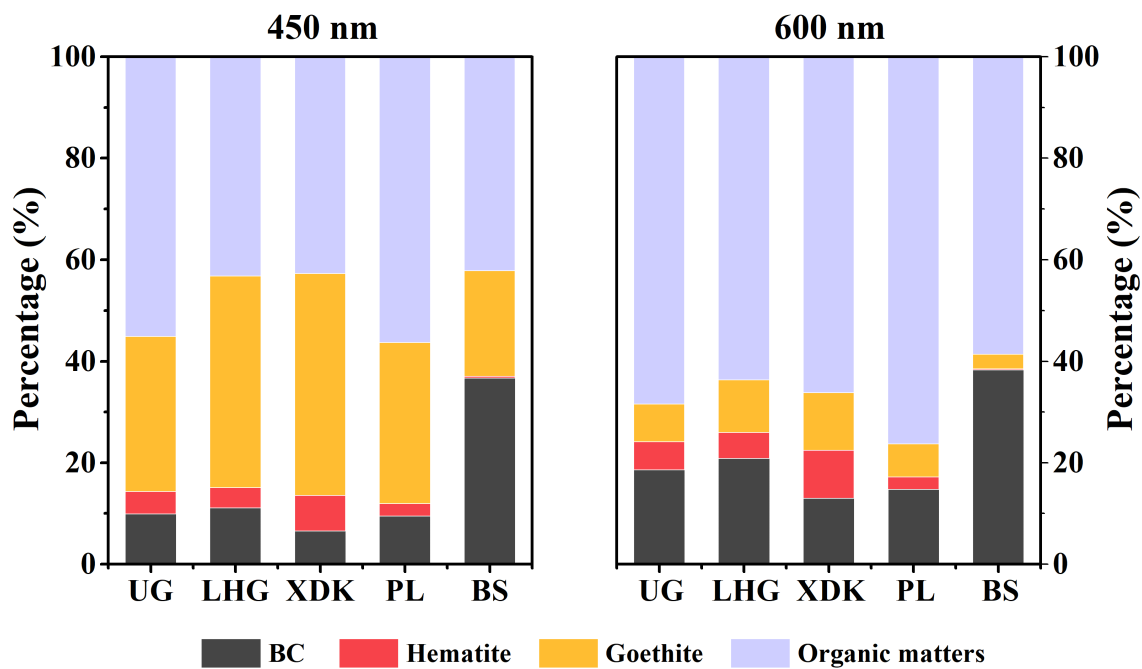

Fig. 6 Apportioning of total light absorption (450 nm and 600 nm, respectively) to black carbon, hematite, goethite and organic matters for the cryoconite from five TP glaciers.
